# Supplementary material for: A distinct topology of BTN3A IgV and B30.2 domains controlled by juxtamembrane regions favors optimal human γδ T cell phosphoantigen sensing
Source: Springer Nature journal article supplement (doi:10.1038/s41467-023-41938-8), 2023-11-22
Supplement: MOESM1 [file 41467_2023_41938_MOESM1_ESM.pdf]

**A distinct topology of intracellular and extracellular BTN3A heteromer domains supports phosphoantigen-mediated activation of human  $\gamma\delta$  T cells**

Mohindar M. Karunakaran<sup>1\*</sup>, Hariharan Subramanian<sup>2,3</sup>, Yiming Jin<sup>4</sup>, Fiyaz Mohammed<sup>5</sup>, Brigitte Kimmel<sup>6</sup>, Claudia Juraske<sup>7-10</sup>, Lisa Starick<sup>1</sup>, Anna Nöhren<sup>1</sup>, Nora Länder<sup>1</sup>, Carrie R. Willcox<sup>5</sup>, Rohit Singh<sup>4</sup>, Wolfgang W. Schamel<sup>7-10</sup>, Viacheslav O. Nikolaev<sup>2,3</sup>, Volker Kunzmann<sup>6</sup>, Andrew J. Wiemer<sup>4</sup>, Benjamin E. Willcox<sup>5</sup>, Thomas Herrmann<sup>1\*</sup>

\*Corresponding authors

[illegible]

**Supplementary Fig 1: Detection of FLAG-VΔ3A at the cell surface in complexes with heteromeric BTN3A.**



**a** The clustal alignment of human BTN3A1, BTN3A2, BTN3A3, and alpaca BTN3 (VpBTN3) protein sequences with conserved amino acids were presented by dots (.). JM is highlighted in yellow and amino acids of interest and their positions are as follows. Highlighted in yellow and underlined: K136, H381, JM region 'KKK' motif of BTN3A1. The clustal consensus revealed the conserved amino acids with asterisks for identical conservation and dots of similar amino acid conservation. **b** The surface-expressed 3A1mC, 3A2, 3A3, or 3A2+3A3 of 3KO transductants detected by mAb 103.2 were presented as histograms. **c** 3KO cells transduced with 3A1 or N-terminus FLAG-tagged 3A1 (FLAG-3A1) or C-terminus mCherry fused 3A1 (3A1mC) in parallel with 293T were treated with titrated concentrations of HMBPP and cocultured with 53/4 human V $\gamma$ 9V $\delta$ 2 TCR reporter cells. The activation of reporter cells was measured via mouse IL-2 ELISA (n=3). Graphical data are presented as mean with SD were analyzed by ordinary two-way ANOVA and SD was shown as error bars. **d** Surface-expressed BTN3A of 293T, 3KO transduced with FLAG-V $\Delta$ 3A1 alone or with FLAG-V $\Delta$ 3A1 and 3A-molecules detected by mAb 103.2 followed by anti-mouse F(ab')<sub>2</sub>-APC conjugate (right) were presented as histograms. **e** The same for 293T, 3KO transduced with FLAG-V $\Delta$ 3A2 alone or with FLAG-V $\Delta$ 3A2 and 3A-molecules (right). **f** 3KO cells cotransduced with FLAG V $\Delta$ 3A1 and 3A1 (left) or 3A2 (center) or 3A3 (right) were stained with mouse-anti-FLAG followed by anti-mouse Alexa Fluor 488 under live conditions. The images captured with confocal microscopy were presented.

**a**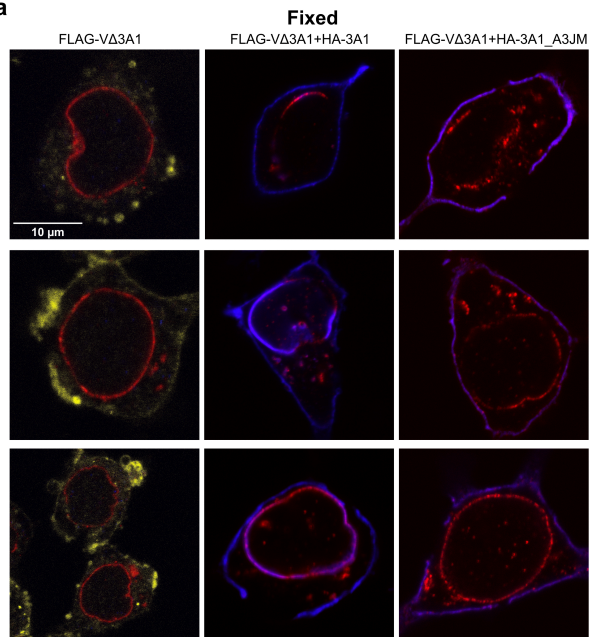**b**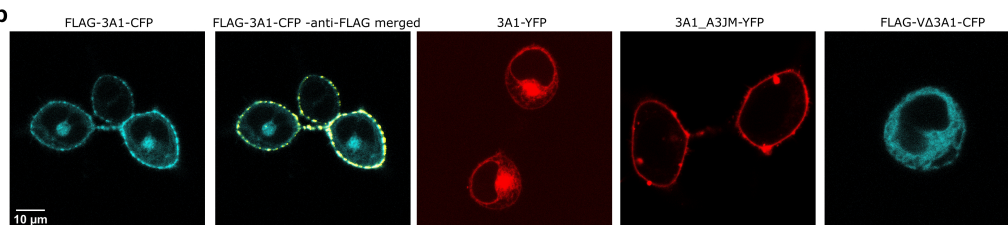**c**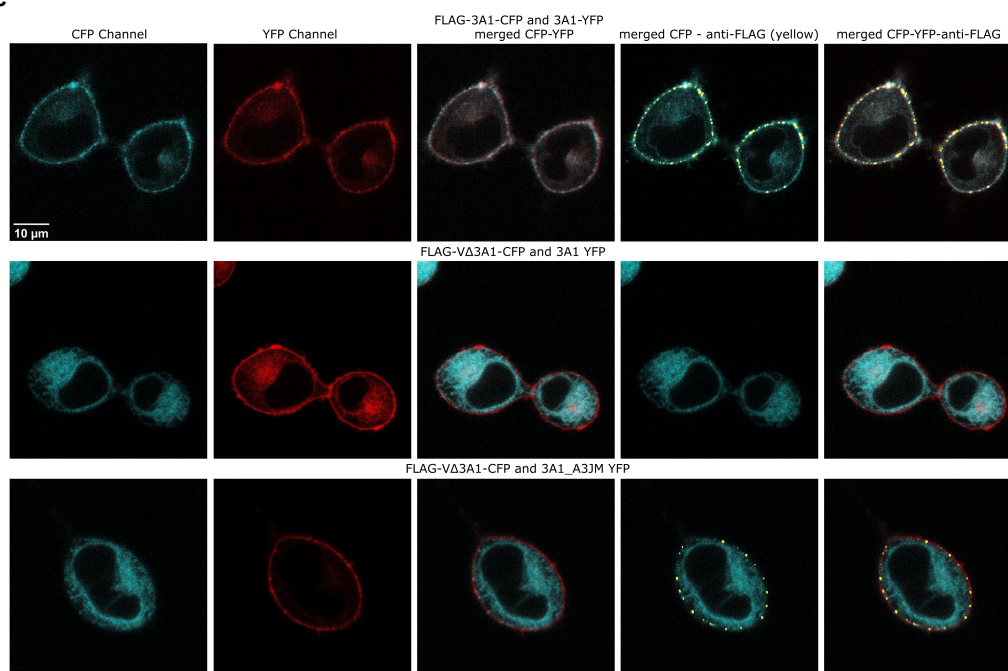

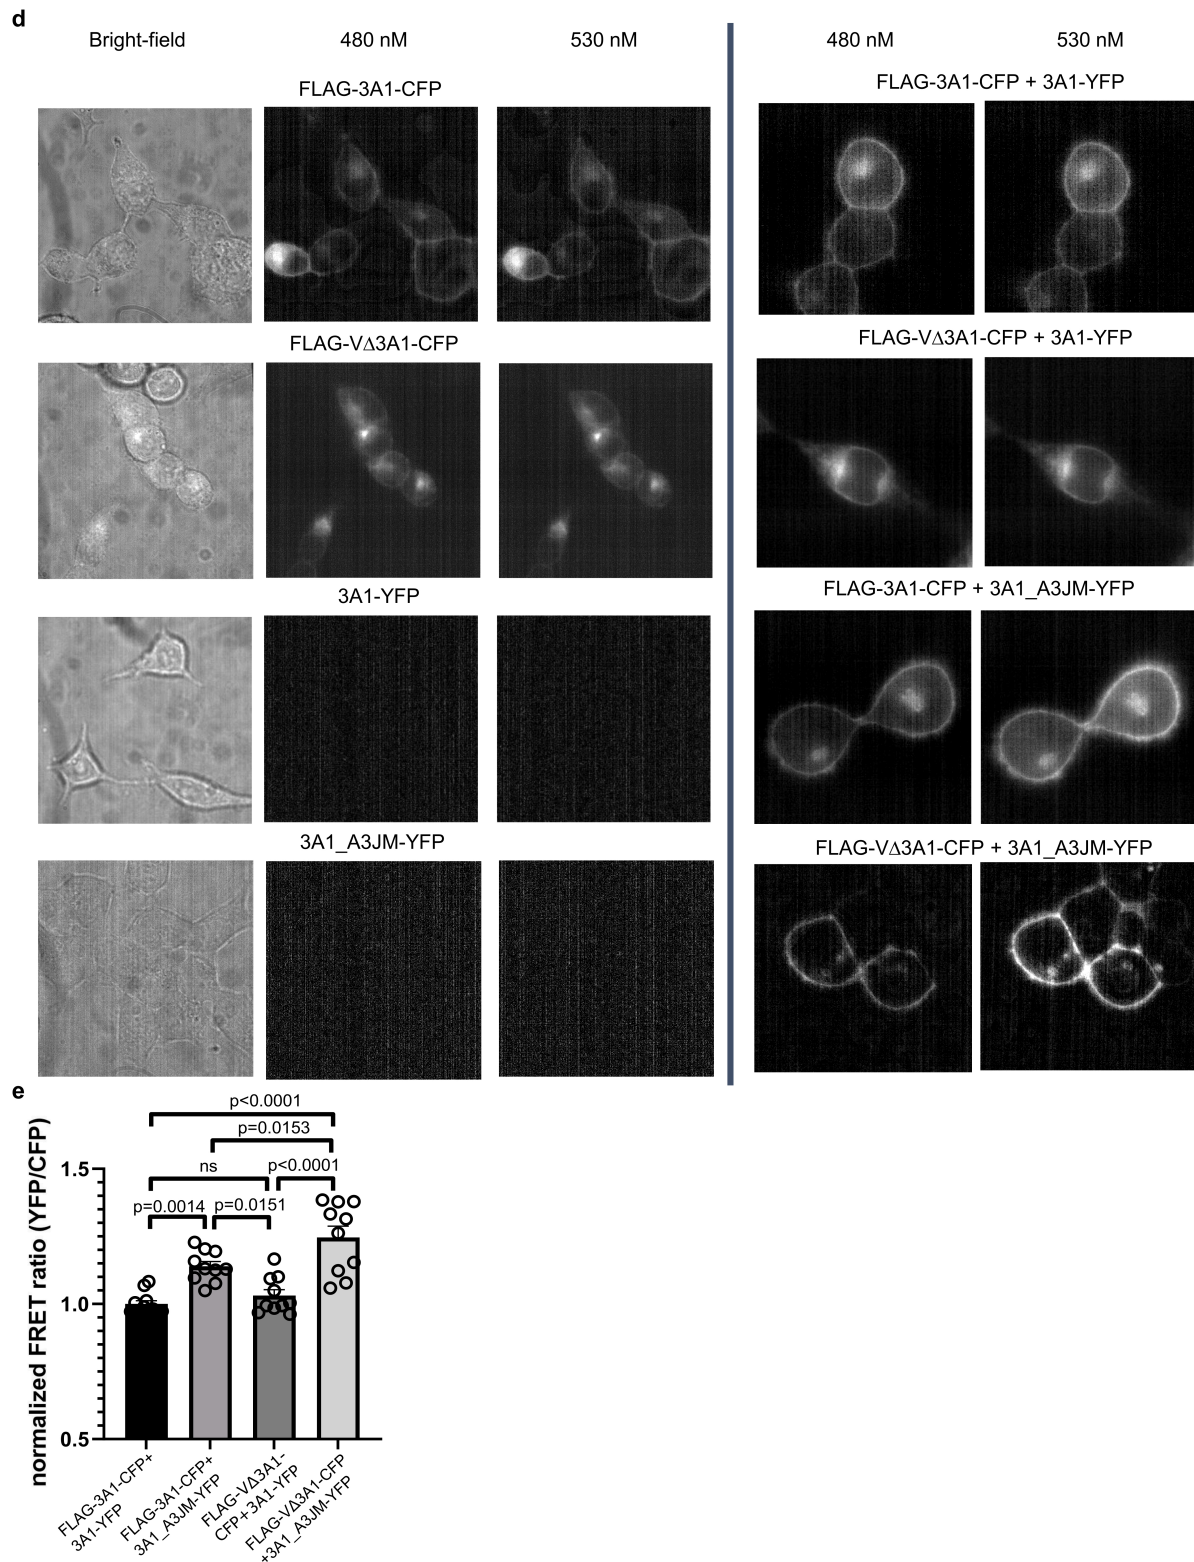

**Supplementary Fig 2: Confocal imaging and FRET with live cells demonstrating BTN3A3<sub>JM</sub> modulating BTN3A complexes.**

**a** The confocal microscopy images of fixed 3KO cells transduced with FLAG-VΔ3A1, FLAG-VΔ3A1 + HA-3A1 or FLAG-VΔ3A1 + HA-3A1\_A3JM chimera were stained with mouse anti-FLAG and rabbit anti-HA followed by anti-mouse-Alexa Fluor 647 (red) and anti-rabbit Alexa Fluor 555 (blue), respectively. 3KO

FLAG VΔ3A1 cells were also stained with BODIPY-FL-DHPE as membrane dye (yellow) to distinguish membrane and perinuclear space staining for FLAG VΔ3A1. Confocal microscopy images by 458, 514, and 648 lasers for the detection of CFP (cyan), YFP (red), and FLAG (mouse anti-FLAG+anti-mouse AF647, represented in yellow) respectively, of **b** Live 3KO cells transduced with FLAG 3A1-CFP (CFP channel) and with anti-FLAG stained (cyan and yellow); 3A1-YFP (YFP channel); 3A1\_A3JM-YFP (YFP channel), FLAG VΔ3A1-CFP (CFP channel). **c** Live 3KO cells co-transduced with FLAG 3A1-CFP and 3A1-YFP (upper lane); 3KO cells co-transduced with FLAG VΔ3A1-CFP and 3A1-YFP (middle lane); 3KO cells co-transduced with FLAG VΔ3A1-CFP and 3A1\_A3JM-YFP (lower lane) were analyzed as in **A** for the detection of CFP (cyan), YFP (red) and FLAG (mouse anti-FLAG+anti-mouse AF647, represented in yellow) respectively, and for colocalization of CFP, YFP (red) and FLAG (yellow). **d** Bright-field images, phase contrast images detected by 480 and 535 nm filters of 3KO cells transduced with either FLAG-3A1-CFP, FLAG-VΔ3A1-CFP, 3A1-YFP or 3A1\_A3JM-YFP (left) and cotransductants of FLAG-3A1-CFP/FLAG-VΔ3A1-CFP with 3A1-YFP or 3A1\_A3JM-YFP. **e** The quantitative analysis of total FRET (cytoplasmic and membrane fluorescence), presented as normalized FRET ratio calculated from 10 cells/group (n=10), and ordinary one-way ANOVA was used for statistical analysis and mean values with the SD were presented in graphs.

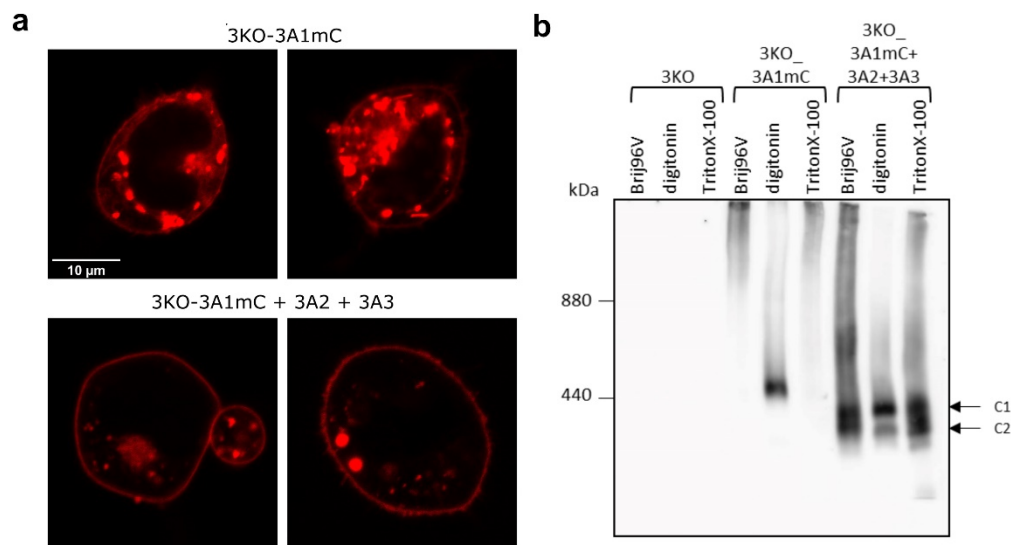

**Supplementary Fig 3: Optimal PAg response of 3A1 requires cooperation of 3A2 and 3A3.**

**a** The cellular distribution of 3A1mC fusion proteins expressed in 3KO (upper lane) or 3KO transduced with 3A2+3A3 (bottom lane) are presented as images captured by confocal microscopy.

**b** 3KO cells, 3KO expressing 3A1mC (3KO\_3A1mC) or 3A1mC+3A2+3A3 were lysed with different detergents, and the lysates were analyzed on a blue native PAGE as follows and C1, C2 represents two complexes with different molecular mass, observed on the blot. Membrane fractions were prepared by disrupting  $4 \times 10^7$  cells in 1 ml of a hypotonic buffer (10 mM Hepes, pH7.4, 42 mM KCl, 5 mM  $MgCl_2$ , and protease inhibitors) using a homogenizer and pelleting the membranes in an ultracentrifuge at 120,000 g. Membranes were lysed in BN lysis buffer (20 mM Bis-Tris, 500 mM  $\epsilon$ -aminocaproic acid, 20 mM NaCl, 2 mM EDTA, pH 8.0, 10% glycerol and protease inhibitors) including the detergent indicated. An equivalent of  $1 \times 10^7$  cells per 10  $\mu$ l of BN lysis buffer was used. Samples were separated by BN-PAGE (4–10%) at 4°C as referenced in Materials and Methods. After the gel separation proteins were detected by Western Blotting using an anti-CD277 antibody (mAb 20.1; Invitrogen) and an HRPO-coupled anti-mouse antibody.



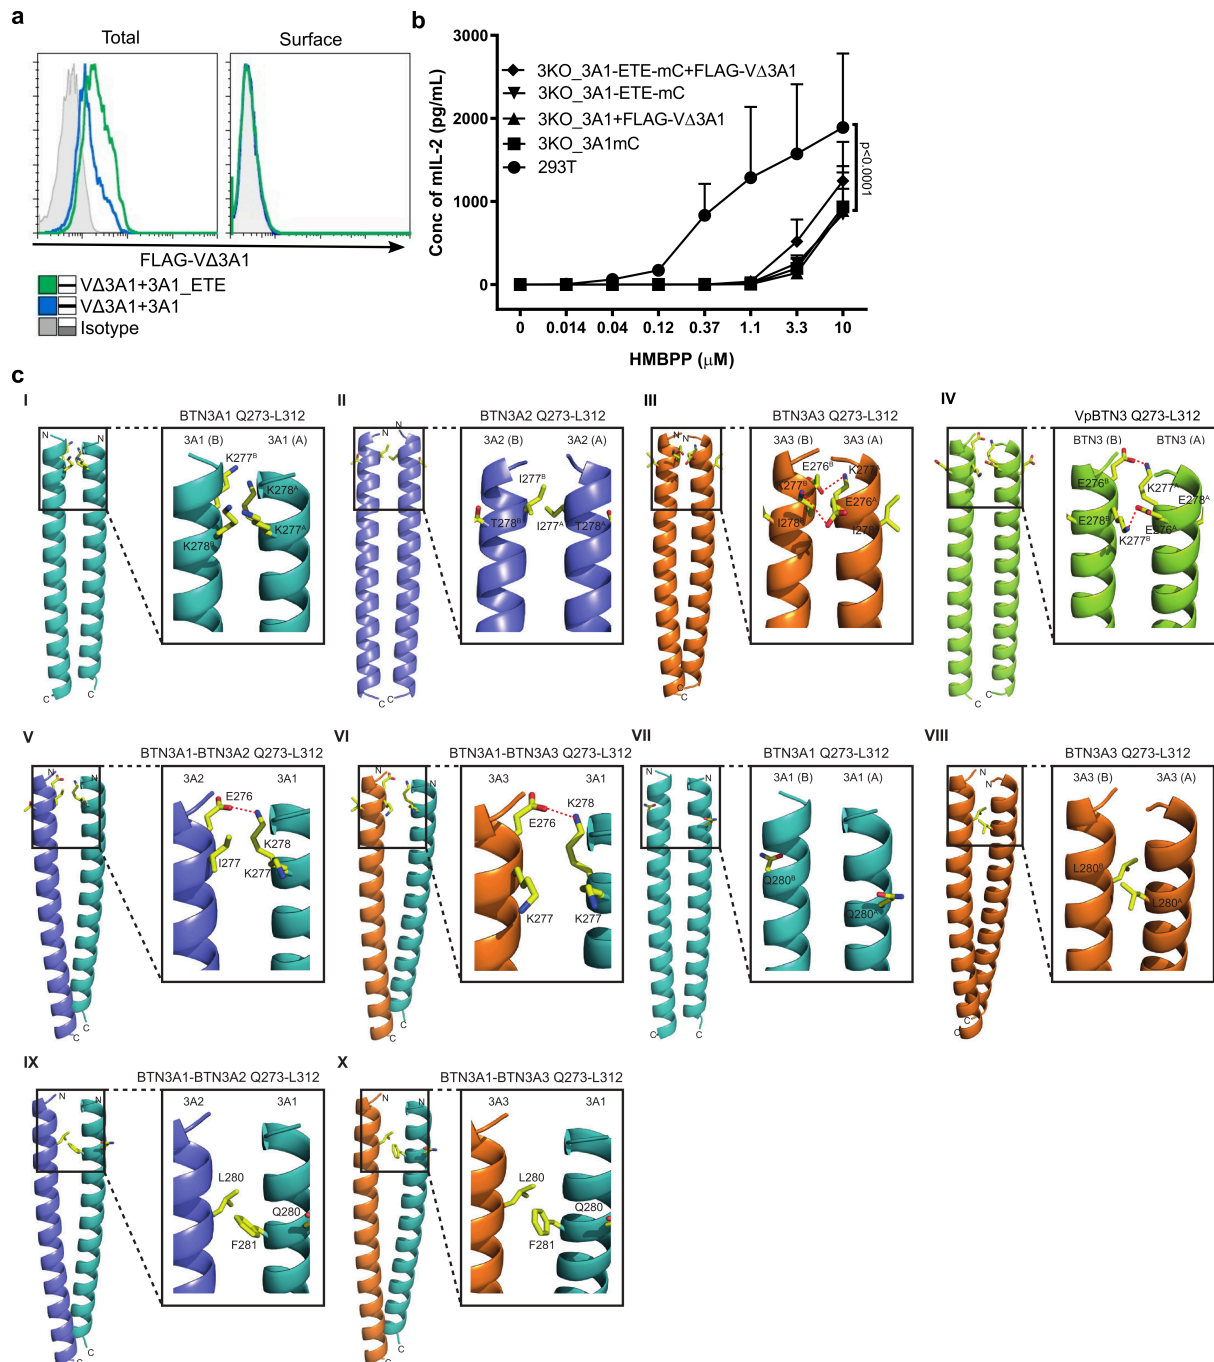

**Supplementary Fig 4: Critical residues in JM controlling the association in BTN3A complexes.**

**a** 3KO cells transduced with FLAG-VΔ3A1 alone or cotransduced with 3A1 or 3A1\_ETE mutant were analyzed for total and surface-expressed FLAG detected by anti-FLAG, followed by anti-mouse F(ab')<sub>2</sub>-APC conjugate. The measurements were presented as histograms. **b** 293T and 3KO cells transduced with FLAG-VΔ3A1 and 3A1 or 3A1\_ETE mutant were cocultured with titrated concentrations of HMBPP and 53/4 human Vγ9Vδ2 TCR reporter cells. The activation of reporter cells was measured by mouse IL-2 ELISA (left) (n=3). Graphical data are presented as mean with SD were analyzed by ordinary two-way ANOVA and SD was shown as error bars. **c** Models of the predicted JM coiled-coil dimers Q273-

L312 were generated using CCBUILDER2 (see Methods). Dimer interface residues are shown as ball and stick. I) BTN3A1 coiled-coil homodimer (focused on residues 276-278). II) BTN3A2 coiled-coil homodimer (focused on residues 276-278). III) BTN3A3 coiled-coil homodimer (focused on residues 276-278). IV) Alpaca BTN3 (VpBTN) coiled-coil homodimer (focused on residues 276-278). V) BTN3A1-BTN3A2 coiled-coil heterodimer (focused on residues 276-278). VI) BTN3A1-BTN3A3 coiled-coil heterodimer (focused on residues 276-278). VII) BTN3A1 coiled-coil homodimer (focused on residue 280). VIII) BTN3A3 coiled-coil homodimer (focused on residue 280). IX) BTN3A1-BTN3A2 coiled-coil heterodimer (focused on residue 280). X) BTN3A1-BTN3A2 coiled-coil heterodimer (focused on residue 280). Polar interactions are highlighted (red dashed lines). Each monomer within the homodimer has been labeled A or B.



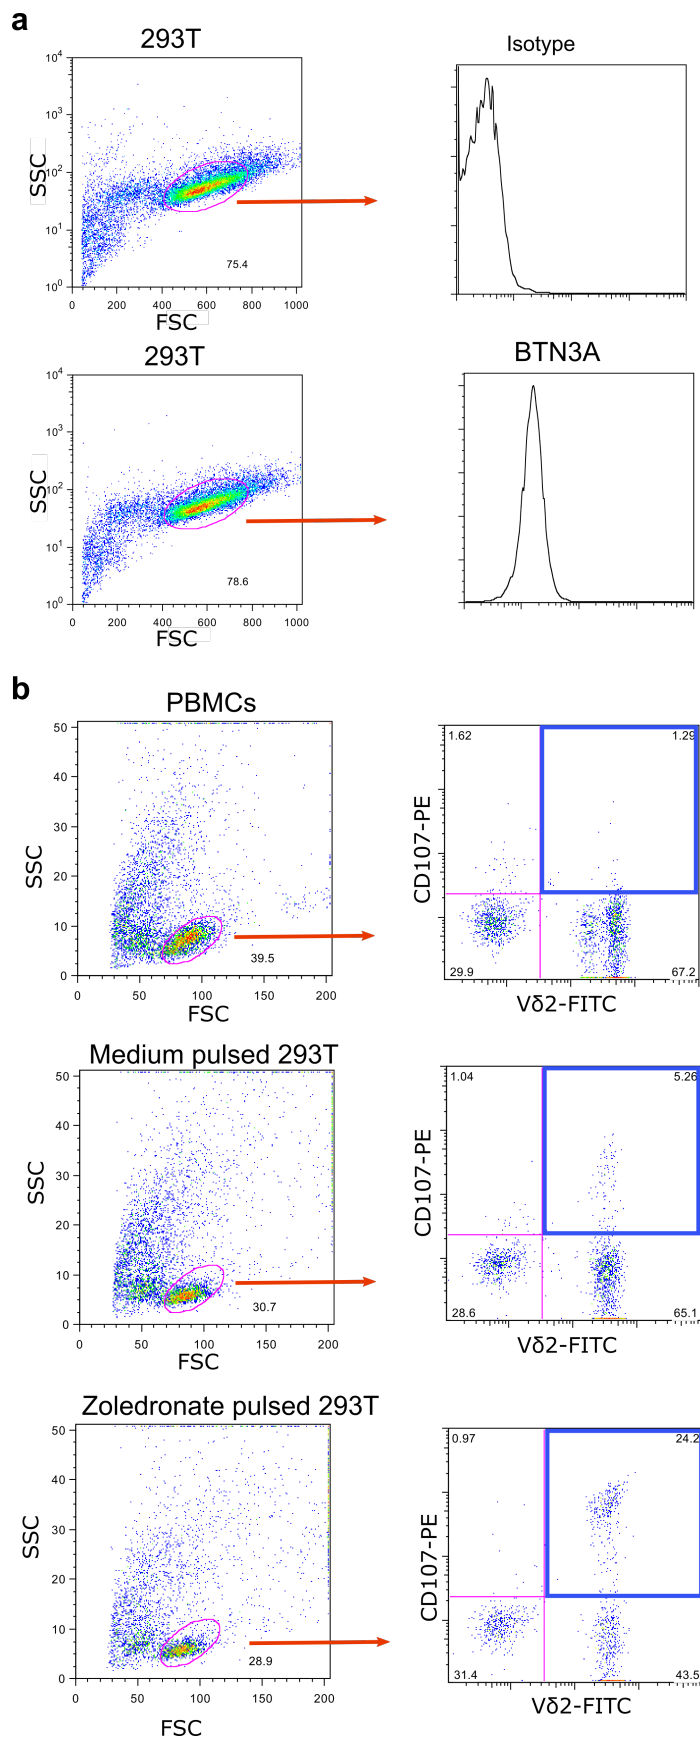

**Supplementary Fig 5: Gating strategy for FACS analysis.**

**a** Representative for the analysis of 293T cells for their surface expression, where the population of interest (oval pink) was defined by FSC and SSC. The expression of the protein of interest was shown as histograms (isotype or BTN3A). Long ticks in X-axis represent the logarithmic scale. **b** Representative for the analysis of PBMC alone or cocultured with 293T. The lymphocyte (oval pink) population was defined by FSC and SSC and it was subjected to Vδ2-FITC vs CD107a-PE gating. The population size of each quadrant was shown in numbers and, Vδ2-FITC<sup>+</sup> and CD107a-PE<sup>+</sup> (blue quadrant) were analyzed and presented as graphs.

### **Supplementary Text:**

#### **Extra-triplet effects contribute to differential dimer stability.**

Based on a parametric  $\alpha$ -helical coiled-coil prediction methodology (CCBuilder 2.0), two regions outside residues 283-285 emerged as likely to differentially affect dimer stability. In particular, K277 and K278 in BTN3A1 are predicted to be closely opposed at the interhelical interface, again contributing to a destabilized BTN3A1 homodimer (Figure S4C I). In contrast, in BTN3A2, I277 is predicted to form favorable non-polar interactions with the identical residue across the coiled-coil interface (Figure S4C II). In BTN3A3 and alpaca BTN3, K277 is predicted to form a salt bridge with the preceding E276 from opposing monomer, with a reciprocal of E276 with K277 from the other chain (Figures S4C III-IV). We predict this arrangement, in combination with changes at 283-285, may considerably stabilize the BTN3A3 and alpaca BTN3 relative to BTN3A1 homodimers. Interactions mediated by this region are also likely to preferentially favor BTN3A1/A2 and BTN3A1/A3 heterodimers vs BTN3A1 homodimer formation (Figures S4C V-VI). Of note, the BTN3A1/3A2 and BTN3A1/A3 dimers suggest elimination of electrostatic repulsive effects mediated by opposition of K277 and K278 across the dimer interface, and suggests the heterodimer is likely to benefit from K278 of BTN3A1 interaction with E276 of 3A2/3A3 (Figure S4C V-VI), an interaction not predicted by BTN3A1 homodimer model. In addition, the presence of Q280 in BTN3A1 is also likely significant (Figure S4C VII), as in all other BTN3 isoforms (homodimers/heterodimers), L280 stabilizes the dimer interface via non-polar packing interactions (Figures S4C VIII-X), whereas in BTN3A1 these are absent, with Q280 remaining polar and solvent exposed. This difference also likely favors BTN3A1 heterodimer formation, as L280 in BTN3A2 and BTN3A3 can also mediate non-polar stacking interactions with F281 (in BTN3A1) (Figures S4C IX-X); in contrast, in BTN3A1 Q280 remains solvent exposed (Figure S4C VII). Notably, the single Alpaca isoform BTN3 retains both L280 and F281 at the interhelical interface, contributing to coiled-coil stabilization. Thus, clearly interhelical interactions outside of the 283-285 region also preferentially destabilize BTN3A1 homodimers relative to both BTN3A2/3 homodimers, and also relative to BTN3A1 heterodimers with BTN3A2/A3. This provides molecular justification for

the finding that introduction of the 283-285 ETE sequence of BTN3A3 into BTN3A1 is insufficient to substantially increase expression and functionality.

#### **Synthesis of 4-hydroxy-3-(4-methylbenzyl)but-2-en-1-yl diphosphate (4-M-HMBPP)**

To a stirred suspension of NaH (60 % in oil, 26.25 mmol) in THF (50 ml) was added ethyl (diethoxyphosphoryl) acetate (**2**) (25 mmol) at 0 °C. The mixture was stirred for 1 hour and *p*-methyl benzyl bromide (**1**) (30 mmol) was then added. The mixture was stirred at room temperature overnight and then quenched with saturated NH<sub>4</sub>Cl at 0 °C. The aqueous layer was extracted with Et<sub>2</sub>O, dried over MgSO<sub>4</sub> and evaporated to give a yellow oil which was purified by silica gel column chromatography to give (**3**) with the yield of **71%**. In the next step, to a stirred suspension of NaH (60% in oil, 2.2 mmol) in THF (5 ml) was added a solution of (**3**) (2 mmol) in THF (4 mL) at 0 °C. Then, the mixture was allowed to stir at room temperature for 1 h and cooled to 0 °C, again. Then a solution of chloroacetaldehyde (50 wt% in H<sub>2</sub>O) in THF (1 ml) was added. The reaction mixture was then stirred at room temperature for 2 hours, diluted with ether and washed with brine. The organic layer was dried over MgSO<sub>4</sub> and evaporated to give a yellow oil, which was further purified by silica gel column chromatography to obtain *E:Z* mixture of (**4**) with the yield of **68%**. Later, the same mixture of compound (**4**) (2 mmol) was dissolved in CH<sub>2</sub>Cl<sub>2</sub> (10 mL) and then slowly added DIBAL (1.2 M 20 wt% solution in toluene, 4.2 mL) at -78 °C under argon. When the starting material was consumed, as monitored by TLC, the reaction was quenched with aqueous sodium potassium tartrate. The aqueous layer was extracted with CH<sub>2</sub>Cl<sub>2</sub> and the combined organic layers dried with NaSO<sub>4</sub>, and concentrated. The yellow residue was purified by flash chromatography on silica gel to afford the desired product (**5**) again as *E:Z* mixture with yield of **57%**. In the last step tris(tetra-*n*-butylammonium) hydrogen diphosphate (4 mmol) was dissolved in MeCN and *E:Z* mixture of (**5**) (2 mmol) was added and stirred for 2 h., purified by Dowex (NH<sub>4</sub><sup>+</sup>) followed by Sephadex LH-20 using methanol as solvent to yield the final product (**6**), **21%**.

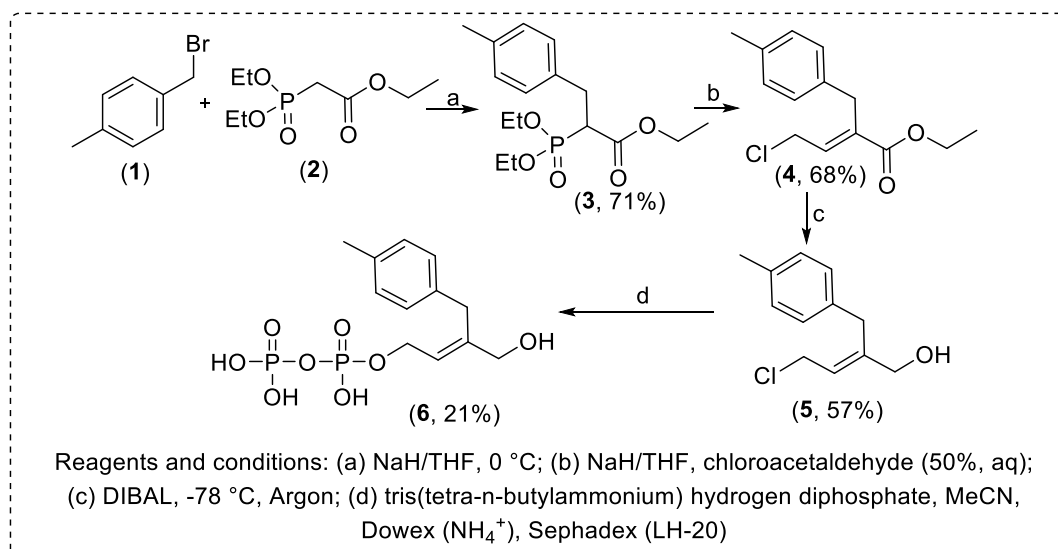

### Spectral Data:

**ethyl 2-(diethoxyphosphoryl)-3-(p-tolyl)propanoate (3):** Yellow oil, 71% yield, <sup>1</sup>H NMR (CDCl<sub>3</sub>, 500 MHz) δ ppm 7.10(s, 4H), 4.24-4.14(m, 5H), 4.13-4.11(m, 2H), 3.28-3.17(m, 2H), 2.33(s, 3H), 1.39-1.36(m, 6H), 1.20-1.17(m, 3H)

**ethyl (E)-4-chloro-2-(4-methylbenzyl)but-2-enoate (4):** Yellow oil, 68% yield, <sup>1</sup>H NMR (CDCl<sub>3</sub>, 500 MHz) (*E:Z* mix 4:1) δ ppm 7.15-7.11(s, 4H), 7.02-6.99(t, *J* = 10, 1H), 4.29-4.28(d, *J* = 5, 2H), 4.25-4.20(m, 2H), 3.75(s, 2H), 2.37(s, 3H), 1.32-1.29(t, *J* = 10, 3H)

**4-chloro-2-(4-methylbenzyl)but-2-en-1-ol (5):** Yellow oil, 57% yield <sup>1</sup>H NMR (CDCl<sub>3</sub>, 500 MHz) (*E:Z* mix 3:1) δ ppm 7.19-7.13(s, 5.55H), 5.95-5.92(m, 1H), 5.69-5.66(m, 0.37H), 4.30-4.28(m, 2H), 4.24-4.22(m, 0.78H), 4.20(s, 0.77H) 4.05(s, 2H), 3.53(s, 2H) 3.52(s, 0.78H) 2.39-2.38(m, 4H) 1.90(s, 1.38H)

**4-hydroxy-3-(4-methylbenzyl)but-2-en-1-yl diphosphate (6):** white semisolid, 21% yield <sup>1</sup>H NMR (CD<sub>3</sub>OD, 500 MHz) (*E:Z* mix 8.3:1.7) δ ppm 7.12-7.06 (s, 4H), 5.88 (s, 1H), 4.78 (s, 2H), 3.89 (s, 2H), 3.49 (s, 2H), 3.37(s, 2H), 2.30 (s, 3H); <sup>31</sup>P NMR(CD<sub>3</sub>OD, 202 MHz) δ ppm -9.82(s, 1P), -10.23(s, 1P); <sup>13</sup>C NMR (CD<sub>3</sub>OD, 125 MHz) δ ppm 141.87, 140.93, 136.29, 136.26, 135.16, 135.07, 128.81, 128.61, 128.53, 128.31, 125.35, 122.99, 64.39, 62.22, 32.93, 19.73, 19.32

# <sup>1</sup>H NMR of Compound(6):

RT-Ar-seph  
1H spectrum

7.119  
7.103  
7.082  
7.066

5.881

4.784

3.889

3.487  
3.371

2.297

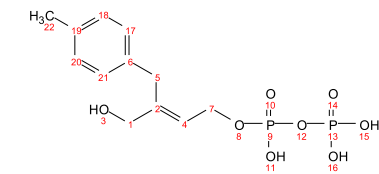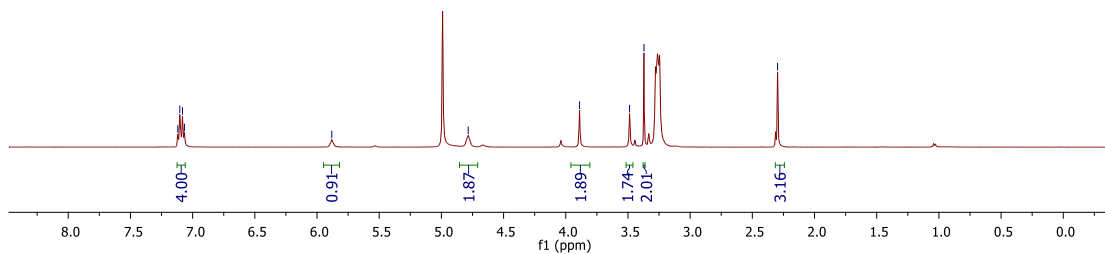

# <sup>13</sup>C NMR of Compound(6):

RT-Ar-methanol-d4  
1D 13C spectrum  
Probe: 5 mm QNP 1H/13

148.806  
148.610  
148.527  
148.308  
148.347  
148.297  
148.192

64.388  
62.218

32.934

19.730  
19.325

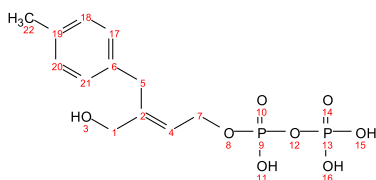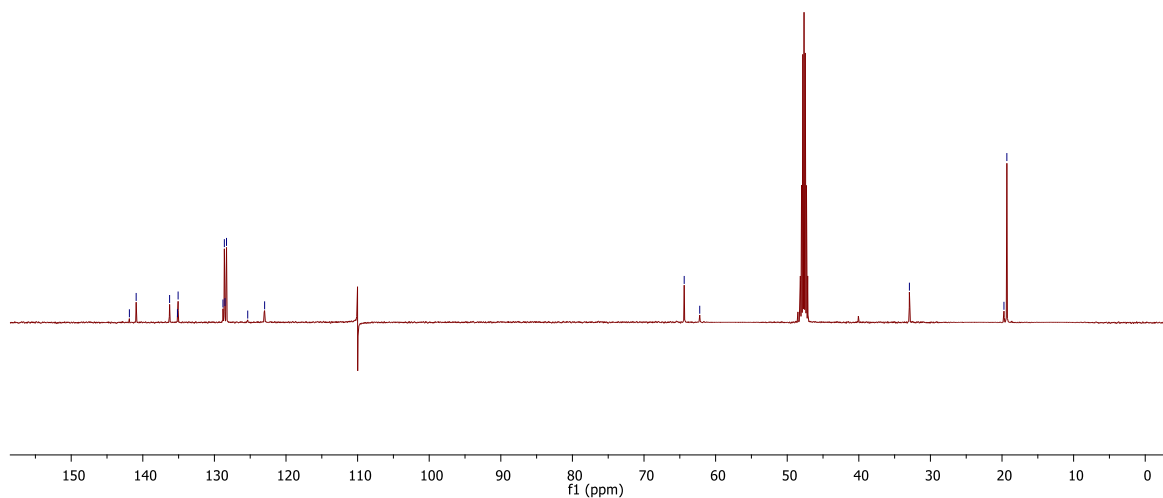

**<sup>31</sup>P NMR of Compound(6):**

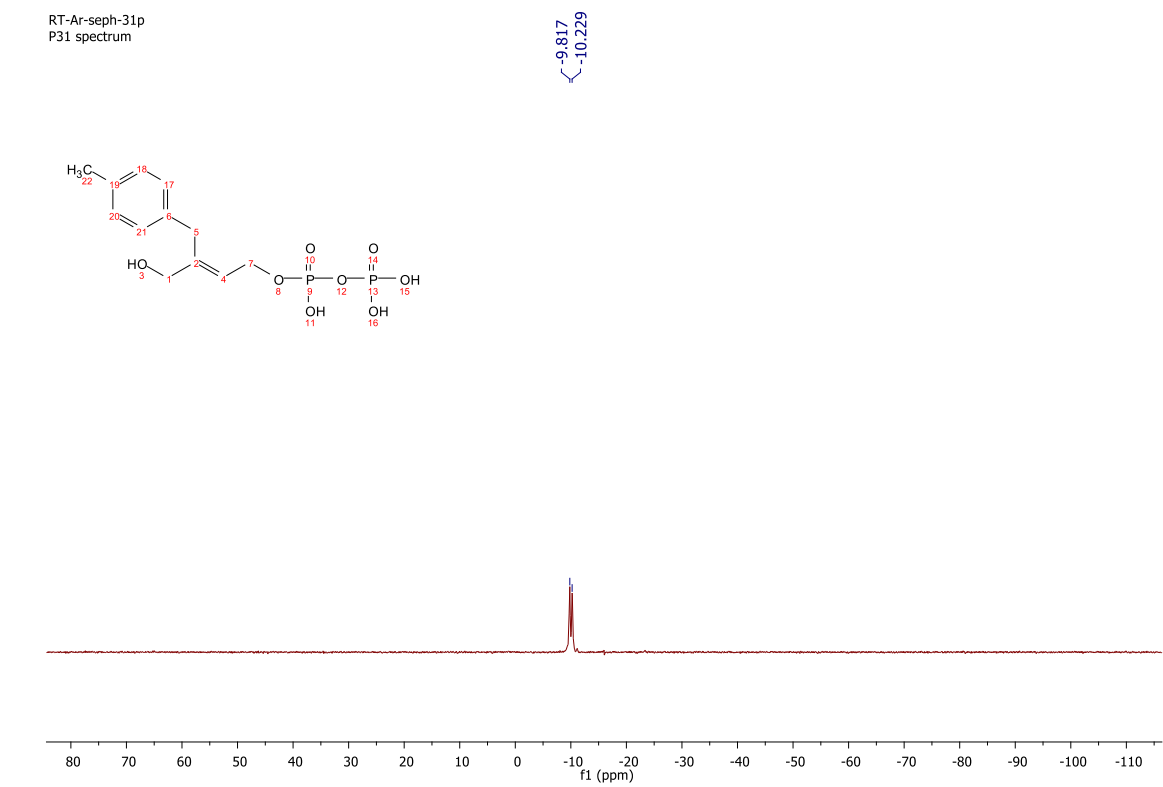

**Supplementary Table 1: CRISPR and primer sequences**

| Primer Name: Sequence                                                                                                                                 |
|-------------------------------------------------------------------------------------------------------------------------------------------------------|
| <b>CRISPR sequences</b>                                                                                                                               |
| BTN3CrispR3Fwd: TCCCGAGGGATCCATCTGGAGTGC                                                                                                              |
| BTN3CrispR3Rev: AAACGCACTCCAGATGGATCCCTC                                                                                                              |
| BTN3A1CrispR4Fwd: TCCCGGGAGAGAACATCCCGACTG                                                                                                            |
| BTN3A1CrispR4Rev: AAACCAGTCGGGATGTTCTCTCCC                                                                                                            |
| BTN3A2CrispR6Fwd: TCCCGCATCTGTGATCATGAGAGG (CRISPR Sequence is present in all BTN3 genes but only BTN3A2 possess Sp Cas9 specific PAM sequence (CGG)) |
| BTN3A2CrispR6Rev: AAACCCTCTCATGATCACAGATGC                                                                                                            |
| BTN3A3CrispR7Fwd: TCCATAAAGTGGAGCGACACCAA                                                                                                             |
| BTN3A3CrispR7Rev: AAATTGGTGTCGCTCCACTTTAT                                                                                                             |
| <b>Primer sequences</b>                                                                                                                               |
| BTN3A1GenolGCFp: GGCCTCTCAAGAATTTAGGCT                                                                                                                |
| BTN3A1GenolGCRp: AATGTTCAGTAAATGTTTGCGTCA                                                                                                             |
| BTN3A2GenolGCFp: TCCCTCATCATGACCACACTTTT                                                                                                              |
| BTN3A2GenolGCRp:ACGAACACCTTTATGGAGGAAAGA                                                                                                              |
| BTN3A3GenolGCFp: GGATGGGAATAGCCCCACATTAC                                                                                                              |
| BTN3A3GenolGCRp: CCTAAAGCAGTGAGTAGCCTTCA                                                                                                              |
| BTN3A1EcoR1KozakFwd: CTATGAATTCGCCGCCACCATGAAAATGGCAAGTTTCCTGGC                                                                                       |
| BTN3A1-BglIIRev: CTACAGATCTTCACGCTGGACAAATAGTCAGGG                                                                                                    |
| BTN3A2_Xba1KozakFwd: CTATTCTAGAGCCGCCACCATGAAAATGGCAAGTTCCTGG                                                                                         |

|                                                                                                                                                                                                              |
|--------------------------------------------------------------------------------------------------------------------------------------------------------------------------------------------------------------|
| BTN3A2_T2Arev<br>CCAGGATTCTCCTCGACGTCACCGCATGTTAGCAGACTTCCTCTGCCCTCGGCTGACTTATTGGTATCGGAC                                                                                                                    |
| BTN3A3_T2A fwd:<br>GAGGGCAGAGGAAGTCTGCTAACATGCGGTGACGTCGAGGAGAATCCTGGCCCAATGAAAATGGCAAGT<br>TCCCTGG                                                                                                          |
| BTN3A3_EcoR1Rev: CTACGAATTCTCAGTAAAGTGCTTCAGTGCGT                                                                                                                                                            |
| BTN3A2_EcoR1Rev: CTACGAATTCTCAGGCTGACTTATTGGTATCG                                                                                                                                                            |
| BTN3A2_EcoR1KozakFwd: ATGAATTCGCCGCCACCATGAAAATGGCAAGTTCCCTGG                                                                                                                                                |
| BTN3A2_Swa1Rev: CTACATTTAAATTCAGGCTGACTTATTGGTATCG                                                                                                                                                           |
| BTN3A3_Swa1Rev: CTACATTTAAATTCAGTAAAGTGCTTCAGTGCGT                                                                                                                                                           |
| FLAGtagBTN3A1Fwd: CAAGGCTAGATCTCAGTTTTCTGTGCTTGGAC                                                                                                                                                           |
| FLAGtagBTN3A1IgVDelFwd: CAAGGCTAGATCTCTGGGTTCTGATCTTCACG                                                                                                                                                     |
| BTN3A1EcoRIRev: TATTGAATTCTCACGCTGGACAAATAGTCAG                                                                                                                                                              |
| EcoRI-KOZAK-HA-Hu-3A1Fwd:<br>ggaccatcctctagaGAATTCGCCGCCACCATGAAAATGGCAAGTTTCCTGGCCTTCCTTCTGCTCAACTTTCGTG<br>TCTGCCTCCTTTTGCTTCAGCTGCTCATGCCTCACTCAGCT                                                       |
| HA-Hu3A1LdrRev:<br>CAGAGGGTCCAAGCACAGAAAAGTGGGATCCAGCCTTGTCGTCATCGTCTTTGTAGTCTGCTGATCCAGCT<br>GAGTGAGGCATGAGCAGCTGA                                                                                          |
| BTN3A1IgVfwd: CAGTTTTCTGTGCTTGGACCTCTG                                                                                                                                                                       |
| pIZ-BamHuBTN3A1Rev: GGGGGAGGGAGAGGGGGATCCTCACGCTGGACAAATAGTCAGGG                                                                                                                                             |
| pHNGFR_3A1-A3JTM inHDFU Fwd: TCCTCTAGAGAATTCGCCGCCACCATGAAAATGGCAAGTTTCCTG                                                                                                                                   |
| pHNGFR_3A1-A3JTM inHDFU Rev: CTGCTTCTGCGGATCCCGCTGGACAAATAGTCAGGG                                                                                                                                            |
| pHNGFR_3A3-A1JTM inHDFU Fwd: TCCTCTAGAGAATTCGCCGCCACCATGAAAATGGCAAGTTTCCTG                                                                                                                                   |
| pHNGFR_3A3-A1JTM inHDFU Rev: CTGCTTCTGCGGATCCGTAAAGTGCTTCAG                                                                                                                                                  |
| K136A_BTN3A1-Fwd: ATGGTGACTTCTATGAAGCAGCCCTGGTGG                                                                                                                                                             |
| K136A_BTN3A1-Rev: CCACCAGGGCTGCTTCATAGAAGTCACCAT                                                                                                                                                             |
| BTN3A1_H381R-Fwd: CCCTGAGAGATTTGAATGGCGTTACTGTGTCCTTGGC                                                                                                                                                      |
| BTN3A1_H381R-Rev: GCCGAGAACAATAACGCCAATTAAATCTCTCAGGG                                                                                                                                                        |
| BTN3A3_R381H-Fwd: CCCTGAGAGATTTGAATGGCATTACTGTGTCCTTGGC                                                                                                                                                      |
| BTN3A3_R381H-Rev: GCCAAGGACACAGTAATGCCATTCAAATCTCTCAGGG                                                                                                                                                      |
| BTN3A1_ETE_Fwd: GAGACAGAGAGAGAGCAAGAGTTGAGAGAA                                                                                                                                                               |
| BTN3A1_ETE_Rev: CTCTCTCTGTCTCTCTGAACTGAGTCTT                                                                                                                                                                 |
| BTN3A3_KKK_Fwd: AAGAAAAAAGAGAGCGAGAGATGAAAGAA                                                                                                                                                                |
| BTN3A3_KKK_Rev: CTCTCTTTTTTCTTCCTGGACAGAGCAAT                                                                                                                                                                |
| piH-MCS: TGGACCATCCTCTAGAgattcAATATTTAAATACCATGGCAATTggatccCCCTCT                                                                                                                                            |
| piH-FLAG MCS:<br>gaattgCCACCATGAAAATGGCAAGTTTCCTGGCCTTCCTTCTGCTCAACTTTCGTGTCTGCCTCCTTTTGCTTC<br>AGCTGCTCATGCCTCACTCAGCTGGATCAGCAGACTACAAGGACGACGATGACAAGGCTggatccCACCATG<br>GTAATTgaattcAATATTTAAATAATagatcc |



pIZ-MCS: TGGACCATCCTCTAGAgattcAATATTTAAATACCATGGCAATTggatccCCCTCT

pIZ-HA:  
gaattcGCCGCCACCATGAAAATGGCAAGTTTCCTGGCCTTCCTTCTGCTCAACTTTCGTGTCTGCCTCCTTTTG  
CTTCAGCTGCTCATGCCTCACTCAGCTGGATCAGCATACCCATACGATGTTCCAGATTACGCTGCTggatcc

**Supplementary Table 2: Plasmids and constructs**

| Plasmid - Insert                                             |
|--------------------------------------------------------------|
| pIZ-3A2, -3A3, 3A2-T2A-3A3                                   |
| pIHFLAG-BTN3A1                                               |
| pIHFLAG-VΔ3A1 and -VΔ3A2                                     |
| pIZHA-3A1, -3A1_A3JM                                         |
| pEGZ-3A3 and -3A1_H381R                                      |
| phNGFR linker mCherry – 3A1                                  |
| phNGFR linker mCherry - 3A1_A3JM, -3A3-R381H, -3A3_A1JM-381H |
| phNGFR linker CFP – 3A1, - FLAG-VΔ3A1                        |
| phNGFR linker YFP – 3A1, -3A1_A3JM                           |
| FgH1tUTG (CRISPR Sequences)                                  |
| FuCas9Cherry                                                 |
| pET-21b - BTN3A1-BFI (BFI)                                   |
| pET-21b – BTN2A1-ID271 (ID271)                               |
